# Supplementary material for: Association of Health Insurance Literacy With Financial Hardship in Patients With Cancer
Source: PubMed Central journal article supplement (PMC9315419; doi:10.1001/jamanetworkopen.2022.23141), 2022-07-25
Supplement: jamanetwopen-e2223141-s001.pdf [file jamanetwopen-e2223141-s001.pdf]

## Supplemental Online Content

Khera N, Zhang N, Hilal T, et al. Association of health insurance literacy with financial hardship in patients with cancer. *JAMA Netw Open*. 2022;5(7):e2223141.  
doi:10.1001/jamanetworkopen.2022.23141

**eFigure.** Association of Financial Knowledge and Financial Literacy With Financial Hardship

**eTable 1.** Association of Health Insurance Literacy With Financial Hardship Assessed by COST-FACIT Score as a Dichotomous Variable (Cutoff for Financial Hardship Being <21) and as a Continuous Variable

**eTable 2.** Association of Health Insurance Literacy With Financial Hardship Measured by National Health Interview Survey Questions

**eAppendix.** Surveys Used in the Study

This supplemental material has been provided by the authors to give readers additional information about their work.

**eFigure.** Association of Financial Knowledge and Financial Literacy With Financial Hardship

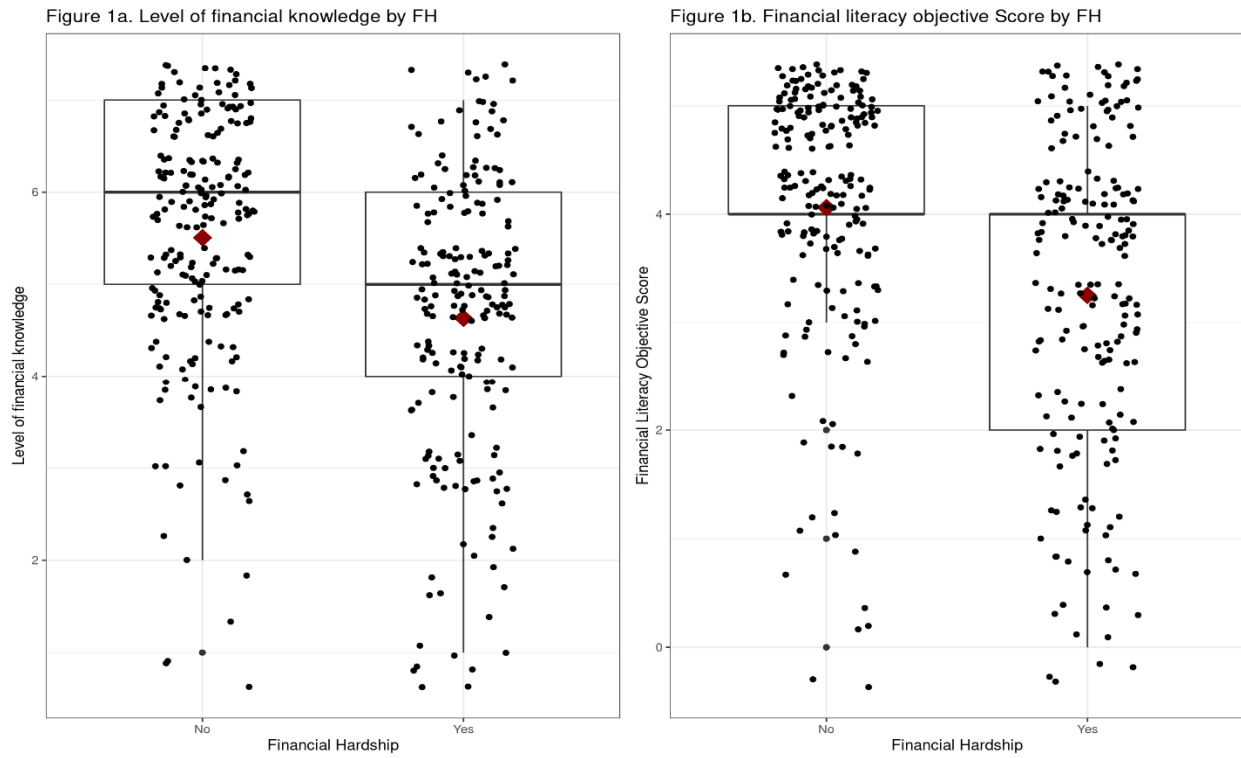

**eTable 1.** Association of Health Insurance Literacy With Financial Hardship Assessed by COST-FACIT Score as a Dichotomous Variable (Cutoff for Financial Hardship Being <21) and as a Continuous Variable

| <b>Variables</b>                                                                            | <b>Model 1</b>       |                | <b>Model 2*</b>      |                |
|---------------------------------------------------------------------------------------------|----------------------|----------------|----------------------|----------------|
| COST-FACIT score as a dichotomous variable (cutoff for financial hardship <21 median score) |                      |                |                      |                |
|                                                                                             | <b>OR (95% CI)</b>   | <b>p value</b> | <b>OR (95% CI)</b>   | <b>p value</b> |
| HILM Overall Score (ten units increase)                                                     | 0.8 (0.66 - 0.96)    | 0.018          | 0.88 (0.71 - 1.08)   | 0.21           |
| Financial literacy score (one-unit increase)                                                |                      |                | 0.79 (0.63 – 0.97)   | 0.03           |
| COST FACIT as continuous variable                                                           |                      |                |                      |                |
|                                                                                             | <b>Beta (95% CI)</b> | <b>p value</b> | <b>Beta (95% CI)</b> | <b>p value</b> |
| HILM Overall Score (ten units increase)                                                     | 1.1 (0.33 – 1.8)     | 0.005          | 0.71 (-0.08 - 1.5)   | 0.08           |
| Financial literacy score (one-unit increase)                                                |                      |                | 0.92 (0.07– 1.8)     | 0.034          |
|                                                                                             |                      |                |                      |                |

Other significant variables in these models include age, gender, time since diagnosis and income

**eTable 2.** Association of Health Insurance Literacy With Financial Hardship Measured by National Health Interview Survey Questions

| <b>Variables</b>                        | <b>OR (95% CI)</b> | <b>p value</b> | <b>OR (95% CI)</b> | <b>p value</b> |
|-----------------------------------------|--------------------|----------------|--------------------|----------------|
| HILM Overall Score (ten units increase) | 0.68 (0.54 - 0.85) | <0.001         | 0.72 (0.57 - 0.91) | 0.005          |
| Financial literacy score                |                    |                | 0.87 (0.68-1.11)   | 0.27           |

Other significant variables in these models include age, gender, time since diagnosis, household size and income

## eAppendix. Surveys Used in the Study

### COST-FACIT

Below is a list of statements that other people with your illness have said are important. **Please circle or mark one number per line to indicate your response as it applies to the past 7 days.**

|      |                                                                                                       | Not<br>at all | A little<br>bit | Some<br>-what | Quite<br>a bit | Very<br>much |
|------|-------------------------------------------------------------------------------------------------------|---------------|-----------------|---------------|----------------|--------------|
| FT1  | I know that I have enough money in savings, retirement, or assets to cover the costs of my treatment  | 0             | 1               | 2             | 3              | 4            |
| FT2  | My out-of-pocket medical expenses are more than I thought they would be                               | 0             | 1               | 2             | 3              | 4            |
| FT3  | I worry about the financial problems I will have in the future as a result of my illness or treatment | 0             | 1               | 2             | 3              | 4            |
| FT4  | I feel I have no choice about the amount of money I spend on care                                     | 0             | 1               | 2             | 3              | 4            |
| FT5  | I am frustrated that I cannot work or contribute as much as I usually do                              | 0             | 1               | 2             | 3              | 4            |
| FT6  | I am satisfied with my current financial situation                                                    | 0             | 1               | 2             | 3              | 4            |
| FT7  | I am able to meet my monthly expenses                                                                 | 0             | 1               | 2             | 3              | 4            |
| FT8  | I feel financially stressed                                                                           | 0             | 1               | 2             | 3              | 4            |
| FT9  | I am concerned about keeping my job and income, including work at home                                | 0             | 1               | 2             | 3              | 4            |
| FT10 | My cancer or treatment has reduced my satisfaction with my present financial situation                | 0             | 1               | 2             | 3              | 4            |
| FT11 | I feel in control of my financial situation                                                           | 0             | 1               | 2             | 3              | 4            |
| FT12 | My illness has been a financial hardship to my family and me                                          | 0             | 1               | 2             | 3              | 4            |

1. In the past 12 months did you or anyone in the family have problems paying or were unable to pay any medical bills?
  - a. Yes
  - b. No
  - c. Refused
  - d. Don't Know
  
2. Do you or does anyone in your family currently have any medical bills that are being paid off over time?
  - a. Yes
  - b. No
  - c. Refused
  - d. Don't Know
  
3. How worried are you right now about paying medical costs for your healthcare?
  - a. very worried
  - b. somewhat worried
  - c. not at all worried
  - d. Refused
  - e. Don't Know
  
4. During the past 12 months, has your medical care BEEN DELAYED because of worry about the cost?
  - a. Yes
  - b. No
  - c. Refused
  - d. Don't Know
  
5. During the past 12 months, was there any time when you needed medical care, but DID NOT GET IT because you couldn't afford it?
  - a. Yes
  - b. No
  - c. Refused
  - d. Don't Know

# Health Insurance Literacy Measures<sup>©</sup> (HILM)

## I. The HILM: Self-Reported Behavior Scales

### Scale 1. Behavior: Choosing a Health Plan

The next set of questions are about **comparing health insurance plans**. When answering the questions, please imagine that you have a choice of health plans.

| When <u>comparing health insurance plans</u> , how likely are you to...                                                                                                                                | Not at all likely | Somewhat likely | Moderately likely | Very likely |
|--------------------------------------------------------------------------------------------------------------------------------------------------------------------------------------------------------|-------------------|-----------------|-------------------|-------------|
| 1. Find out if you have to meet a deductible for health care services? <i>A deductible is the amount of money you have to pay before your health insurance will pay anything for your health care.</i> |                   |                 |                   |             |
| 2. Look to see which doctors and hospitals are covered in each plan?                                                                                                                                   |                   |                 |                   |             |
| 3. Understand what you have to pay for prescription drugs?                                                                                                                                             |                   |                 |                   |             |
| 4. Understand what you would have to pay for emergency department visits?                                                                                                                              |                   |                 |                   |             |
| 5. Understand what you would have to pay for specialist visits?                                                                                                                                        |                   |                 |                   |             |
| 6. Find out if the plans cover unexpected costs such as hospital stays?                                                                                                                                |                   |                 |                   |             |

### Scale 2. Behavior: Using a Health Plan

The next questions are about your experiences **using your health insurance plan**, for example, going to the doctor to receive care covered by the health plan.

| When using your health insurance plan, how likely are you to ...                                                                                                                                                                          | Not at all likely | Somewhat likely | Moderately likely | Very likely |
|-------------------------------------------------------------------------------------------------------------------------------------------------------------------------------------------------------------------------------------------|-------------------|-----------------|-------------------|-------------|
| 1. Look into what your health plan will and will not cover before you get health care services?                                                                                                                                           |                   |                 |                   |             |
| 2. Look to member services to tell you what medical services your health plan covers?                                                                                                                                                     |                   |                 |                   |             |
| 3. Find out if a doctor is in-network before you see him/her? <i>A network is a group of doctors, hospitals, and other health care professionals who have a contract with a health insurance plan to take care of the plan's members.</i> |                   |                 |                   |             |

| When using your health insurance plan, how likely are you to ...                                              | Not at all likely | Somewhat likely | Moderately likely | Very likely |
|---------------------------------------------------------------------------------------------------------------|-------------------|-----------------|-------------------|-------------|
| 4. Review the statements you get from your health plan showing what you owe and what they paid for a service? |                   |                 |                   |             |

## II. HILM: Self-Confidence Scales

### Scale 3. Confidence: Choosing a Health Plan

The next questions are about how confident you feel choosing a health insurance plan.

| How confident are you that...                                                                                                     | Not all confident | Slightly confident | Moderately confident | Very confident |
|-----------------------------------------------------------------------------------------------------------------------------------|-------------------|--------------------|----------------------|----------------|
| 1. You understand health insurance terms?                                                                                         |                   |                    |                      |                |
| 2. You know where to find the information you need to choose a health plan if you were not offered insurance through an employer? |                   |                    |                      |                |
| 3. You know how to estimate what you have to pay for your health care needs in the next year, not including emergencies?          |                   |                    |                      |                |
| 4. You know where to go for help if you were having trouble affording health insurance outside an employer?                       |                   |                    |                      |                |
| 5. You know what questions to ask so you can choose the best health plan for you?                                                 |                   |                    |                      |                |
| 6. You would choose the health plan that is best for you?                                                                         |                   |                    |                      |                |

### Scale 4. Confidence: Using a Health Plan

The next questions ask how confident you feel about using health insurance.

| How confident are you that...                                                                          | Not all confident | Slightly confident | Moderately confident | Very confident |
|--------------------------------------------------------------------------------------------------------|-------------------|--------------------|----------------------|----------------|
| 1. You know most of the things you need to know about using health insurance?                          |                   |                    |                      |                |
| 2. You know how to find out what is and is not covered before you receive a health care service?       |                   |                    |                      |                |
| 3. You know how to figure out your share of the cost for care, after the health plan pays their share? |                   |                    |                      |                |
| 4. You know what questions to ask your health plan if you have a coverage problem?                     |                   |                    |                      |                |



| How confident are you that...                                                                        | Not all confident | Slightly confident | Moderately confident | Very confident |
|------------------------------------------------------------------------------------------------------|-------------------|--------------------|----------------------|----------------|
| 5. You know what to do if your health plan refuses to pay for a service you think should be covered? |                   |                    |                      |                |

Paez, K.A., Mallery, C.J., Noel, H., Pugliese, C., McSorely, V.E., Lucado, J.L., & Ganachari, D. (October, 2014). Development of the Health Insurance Literacy Measure (HILM): Conceptualizing and Measuring Consumer Ability to Choose and Use Private Health Insurance. *Journal of Health Communication*.

## Financial Literacy Scale

- 1) On a scale of 1 to 7 (1 being very low and 7 being very high), what is your level of financial knowledge?
  - a. 1
  - b. 2
  - c. 3
  - d. 4
  - e. 5
  - f. 6
  - g. 7
  
- 2) Suppose you had \$100 in a savings account and the interest rate was 2% per year. After 5 years, how much do you think you would have in the account if you left the money to grow?
  - a. More than \$102
  - b. Exactly \$102
  - c. Less than \$102
  - d. Do not know
  - e. Refuse to answer
  
- 3) Imagine that the interest rate on your savings account was 1% per year and inflation was 2% per year. After 1 year, how much would you be able to buy with the money in this account?
  - a. More than today
  - b. Exactly the same
  - c. Less than today
  - d. Do not know
  - e. Refuse to answer
  
- 4) If interest rates rise, what will typically happen to bond prices?
  - a. They will rise
  - b. They will fall
  - c. They will stay the same
  - d. There is no relationship between bond prices and the interest rates
  - e. Do not know
  - f. Refuse to answer
  
- 5) Please tell me whether this statement is true or false. A 15-year mortgage typically requires higher monthly payments than a 30-year mortgage, but the total interest paid over the life of the loan will be less.
  - a. True
  - b. False

- c. Do not know
- d. Refuse to answer

6) Please tell me whether this statement is true or false. Buying a single company's stock usually provides a safer return than a stock mutual fund.

- a. True
- b. False
- c. Do not know
- d. Refuse to answer
